# Supplementary material
Source: Springer Nature journal article supplement (https://www.springermedizin.de/resource/supplementary/13014_2007_90_MOESM6_ESM.pdf/9632898)

s25  
AAA  
2.5m m

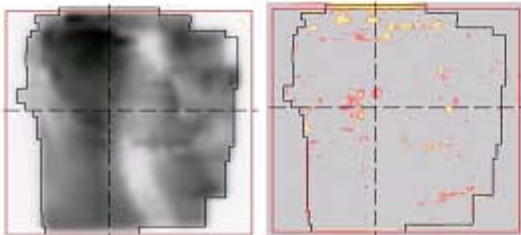

s80  
AAA  
2.5m m

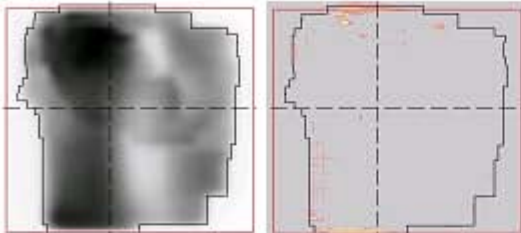

s25  
AAA  
5m m

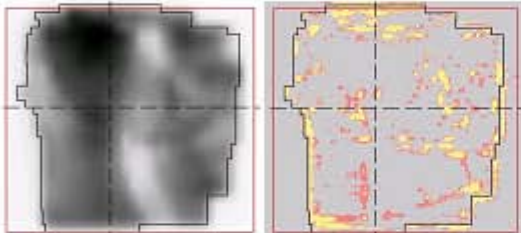

s80  
AAA  
5m m

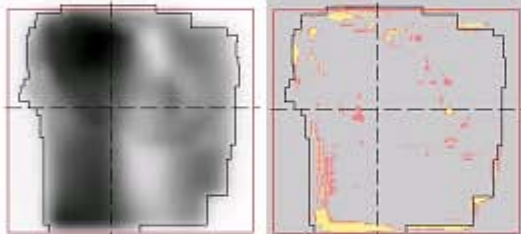

s25  
PBC  
2.5m m

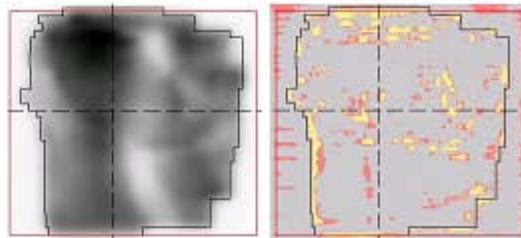

s80  
PBC  
2.5m m

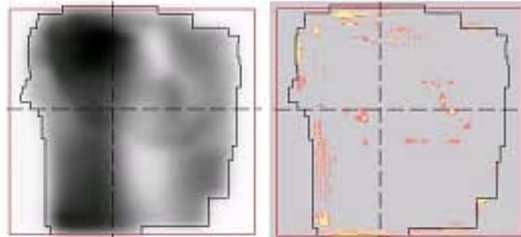

s25  
PBC  
5m m

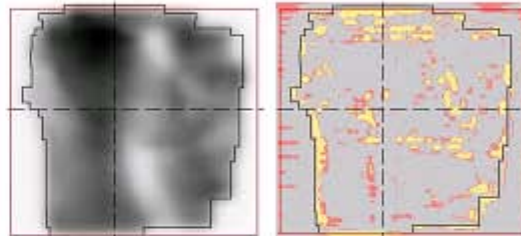

s80  
PBC  
5m m

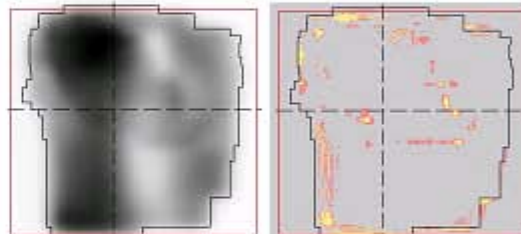

Supplement: MOESM6 [file 9632898]
